# Supplementary material for: Influence of Cu doping on the visible-light-induced photocatalytic activity of InVO4
Source: Royal Society of Chemistry journal article supplement (doi:10.1039/c6ra27138c), 2017-01-01
Supplement: c6ra27138c1.pdf [file c6ra27138c1.pdf]

## Supporting Information

### **Influence of Cu doping on the visible-light-induced photocatalytic activity of InVO<sub>4</sub>**

Natda Wetchakun,<sup>a\*</sup> Pimonrat Wanwaen,<sup>a</sup> Sukon Phanichphant,<sup>b</sup> and Khatcharin Wetchakun<sup>c</sup>

<sup>a</sup>Department of Physics and Materials Science, Faculty of Science, Chiang Mai University,  
Chiang Mai 50200, Thailand

<sup>b</sup>Materials Science Research Centre, Faculty of Science, Chiang Mai University, Chiang Mai  
50200, Thailand

<sup>c</sup>Program of Physics, Faculty of Science, Ubon Ratchathani Rajabhat University, Ubon  
Ratchathani 34000, Thailand

\* Author for correspondence; E-Mail: natda\_we@yahoo.com, Tel. +66 84 0459424, Fax. +66  
5394 3445

## Materials characterization

The interplanar spacing ( $d_{hkl}$ ) values of all samples were calculated from (112) plane as shown in Table S1. The interplanar spacing of (112) orthorhombic crystallographic plane of 0.5-5.0 mol% Cu-doped  $\text{InVO}_4$  increased compared with pure  $\text{InVO}_4$ , implying that  $\text{Cu}^{2+}$  ions are substituted into orthorhombic  $\text{InVO}_4$  lattice.

**Table S1**  $d_{hkl}$ -spacing at (112) plane of pure  $\text{InVO}_4$  and 0.5-5.0 mol% Cu-doped  $\text{InVO}_4$

| Samples                | $2\theta$ | $\theta$ | $\sin\theta$ | $\lambda$ (nm) | $d_{hkl}$ (nm) |
|------------------------|-----------|----------|--------------|----------------|----------------|
| Pure $\text{InVO}_4$   | 33.175    | 16.588   | 0.2854       | 0.1540         | 0.2697         |
| 0.5Cu- $\text{InVO}_4$ | 33.070    | 16.535   | 0.2846       | 0.1540         | 0.2706         |
| 1.0Cu- $\text{InVO}_4$ | 33.055    | 16.528   | 0.2845       | 0.1540         | 0.2707         |
| 2.0Cu- $\text{InVO}_4$ | 33.085    | 16.529   | 0.2845       | 0.1540         | 0.2707         |
| 5.0Cu- $\text{InVO}_4$ | 33.070    | 16.535   | 0.2846       | 0.1540         | 0.2706         |
